# Supplementary material for: Tuning the high-temperature properties of Pr2NiO4+δby simultaneous Pr- and Ni-cation replacement
Source: Royal Society of Chemistry journal article supplement (doi:10.1039/c6ra03099h), 2016-01-01
Supplement: c6ra03099h1.pdf [file c6ra03099h1.pdf]

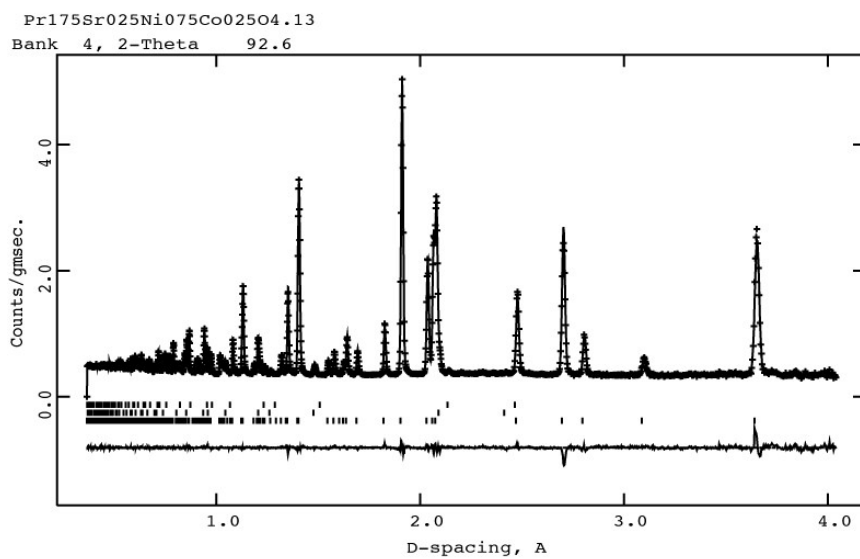

**Fig. S1.** Observed, calculated, and difference NPD patterns for the  $x=0.25$  sample. Vertical lines show positions of reflections for CoO, NiO and Pr<sub>1.75</sub>Sr<sub>0.25</sub>Ni<sub>0.75</sub>Co<sub>0.25</sub>O<sub>4.11(1)</sub> upwards.

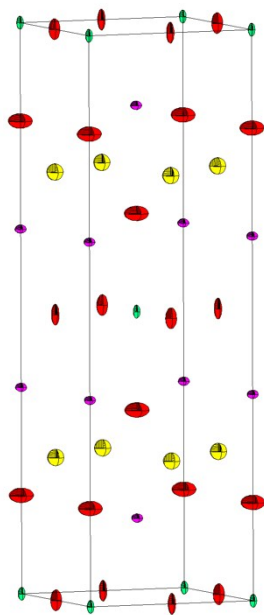

**Fig. S2.** Atomic displacement ellipsoids in the crystal structure of the  $x=0.25$  phase. The oxygen atoms are O1 and O2 (red) as well as O3 (yellow). The cations are Co/Ni (green) and Pr/Sr (violet).

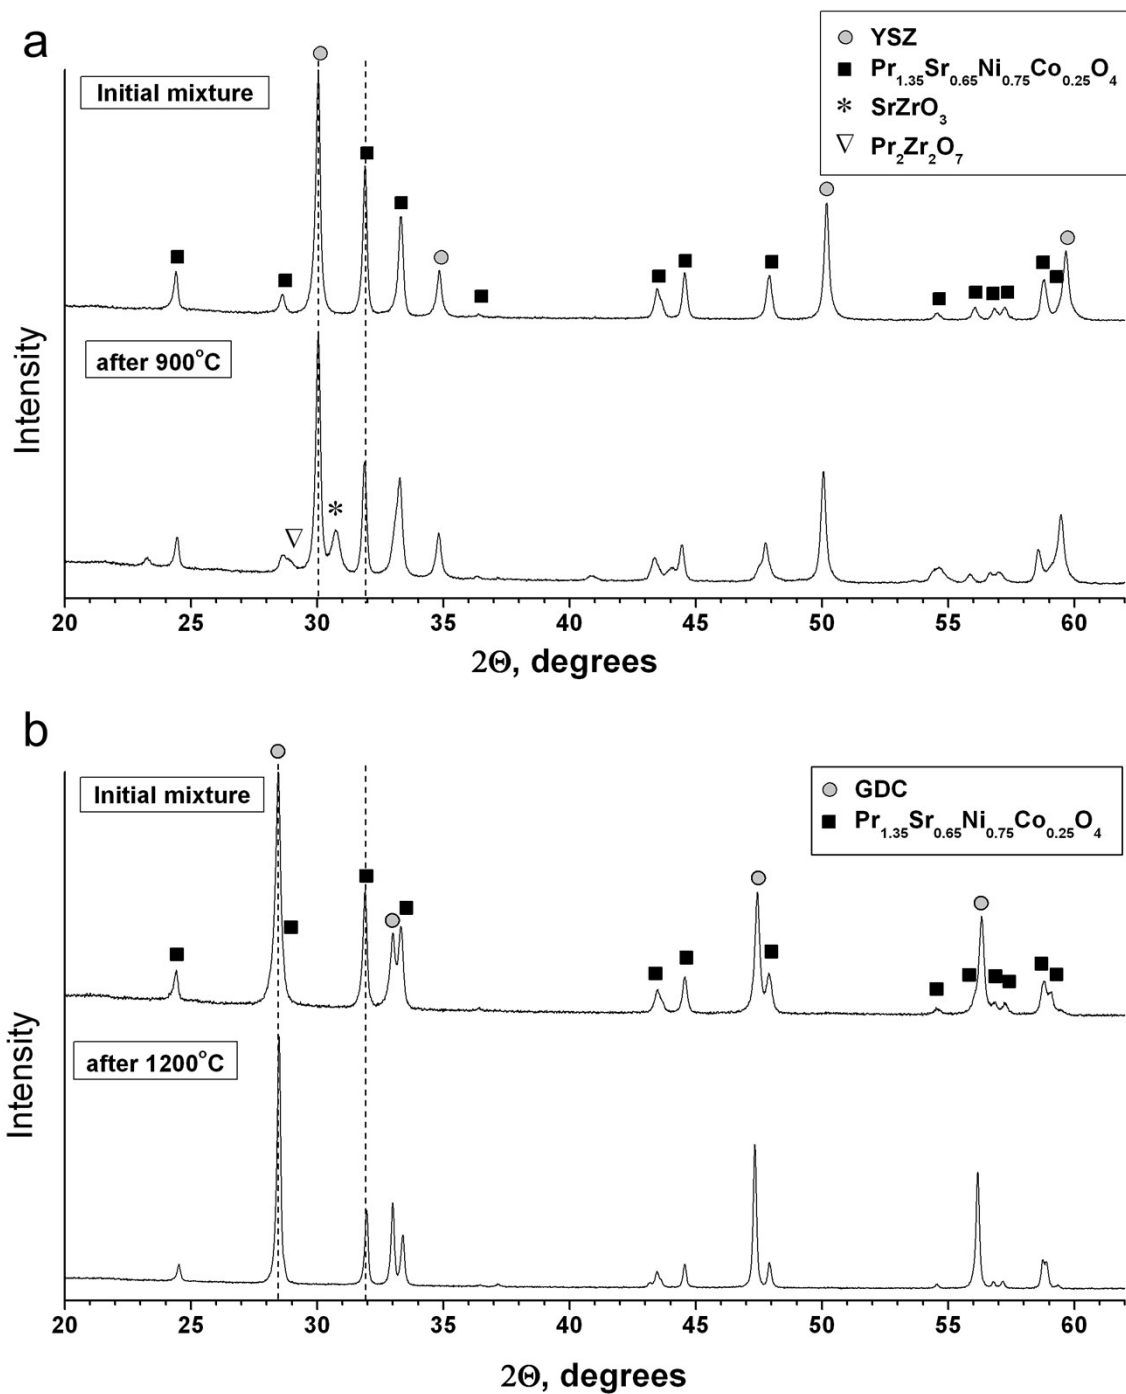

**Fig. S3.** XRPD patterns of  $\text{Pr}_{1.35}\text{Sr}_{0.65}\text{Ni}_{0.75}\text{Co}_{0.25}\text{O}_4/\text{YSZ}$  (a) and  $\text{Pr}_{1.35}\text{Sr}_{0.65}\text{Ni}_{0.75}\text{Co}_{0.25}\text{O}_4/\text{GDC}$  (b) mixtures initial (upper patterns) and after annealing for at 900°C (YSZ) and 1200°C (GDC) (lower patterns).

**Table S1**

Rietveld refinement of the NPD data collected using the POLARIS diffractometer for  $\text{Pr}_{2-x}\text{Sr}_x\text{Ni}_{1-x}\text{Co}_x\text{O}_{4+\delta}$  (S.G.  $I4/mmm$ ),  $x=0.25$  (first line)<sup>a</sup> and  $0.75$  (second line)<sup>b</sup>.

| Atom         | $x$ | $y$ | $z$        | Occupancy   | Atomic displacement parameter ( $\times 100 \text{ \AA}^2$ ) <sup>c</sup> |          |          |          |
|--------------|-----|-----|------------|-------------|---------------------------------------------------------------------------|----------|----------|----------|
|              |     |     |            |             | $U_{\text{iso}}/U_{\text{eq}}$                                            | $U_{11}$ | $U_{22}$ | $U_{33}$ |
| <b>Pr/Sr</b> | 0   | 0   | 0.36142(5) | 0.875/0.125 | 0.54                                                                      | 0.63(1)  | 0.63(1)  | 0.63(1)  |
|              | 0   | 0   | 0.36059(5) | 0.625/0.375 | 0.32                                                                      | 0.37(2)  | 0.37(2)  | 0.22(2)  |
| <b>Ni/Co</b> | 0   | 0   | 0.0        | 0.75/0.25   | 0.44                                                                      | 0.227(9) | 0.227(9) | 0.227(9) |
|              | 0   | 0   | 0          | 0.25/0.75   | 0.21                                                                      | 0.02(2)  | 0.02(2)  | 0.02(2)  |
| <b>O1</b>    | 0   | 0.5 | 0.0        | 1.0         | 1.02                                                                      | 0.67(2)  | 0.22(2)  | 2.18(3)  |
|              | 0   | 0.5 | 0.0        | 1.0         | 0.57                                                                      | 0.67(2)  | 0.15(2)  | 0.88(3)  |
| <b>O2</b>    | 0   | 0   | 0.17212(6) | 1.0         | 2.30                                                                      | 2.92(2)  | 2.92(2)  | 1.04(3)  |
|              | 0   | 0   | 0.16669(5) | 1.0         | 1.07                                                                      | 1.12(2)  | 1.12(2)  | 0.99(3)  |
| <b>O3</b>    | 0   | 0.5 | 0.25       | 0.045(2)    | 1.4(3)                                                                    |          |          |          |

<sup>a</sup>  $a=3.82010(5) \text{ \AA}$ ;  $c=12.3900(2) \text{ \AA}$ ;  $\chi^2=3.91$ ;  $R_p=0.0284$ ;  $R_{\text{wp}}=0.0179$ .

<sup>b</sup>  $a=3.79447(3) \text{ \AA}$ ;  $c=12.3255(1) \text{ \AA}$ ;  $\chi^2=7.08$ ;  $R_p=0.0254$ ;  $R_{\text{wp}}=0.0417$ .

<sup>c</sup>  $U_{12}=U_{13}=U_{23}=0.0$  for all atoms.

**Table S2**

Selected interatomic distances (Å) in the x=0.25 and x=0.75 phases.

| Distances |      | 0.25       | 0.75       |    |
|-----------|------|------------|------------|----|
| Ni/Co     | - O1 | 1.91005(2) | 1.89724(1) | x4 |
|           | O2   | 2.1325(8)  | 2.0545(6)  | x2 |
| Pr/Sr     | - O1 | 2.5684(4)  | 2.5597(4)  | x4 |
|           | O2   | 2.346 (1)  | 2.3900(8)  | x1 |
|           | O2   | 2.7330 (2) | 2.7041(1)  | x4 |
|           | O3   | 2.3567(4)  | -          |    |
